## Supplementary Information

### **A critical switch in the enzymatic properties of the Cid1 protein deciphered from its product-bound crystal structure**

Paola Munoz-Tello<sup>1</sup>, Caroline Gabus<sup>1</sup> and Stéphane Thore<sup>1,\*</sup>

<sup>1</sup> Department of Molecular Biology, University of Geneva, Geneva, 1211, Switzerland

\* To whom correspondence should be addressed. Tel: 4122 379 6127; Fax: 4122 379 6868; Email: [stephane.thore@unige.ch](mailto:stephane.thore@unige.ch)

## Supplementary Tables

**Table SI. Primers for mutagenesis**

| Mutant   | Primer forward (5'→3')                   | Primer reverse (5'→3')                  |
|----------|------------------------------------------|-----------------------------------------|
| R139A    | TTTTACAAAGGGCAGCAATTCCCATT<br>ATC        | GATAATGGGAATTGCTGCCCTTTGT<br>AAAA       |
| K144A    | CAAGAATTCCCATTATCGCATTAAACA<br>TCTGATACG | CGTATCAGATGTTAATGCGATAATG<br>GGAATTCTTG |
| D160A    | CGTTTCAATGTGCTATTGGATTTAAC               | GTAAATCCAATAGCACATTGAAAC<br>G           |
| N165A    | GATATTGGATTTAACACGCGTCTAG<br>CTATTC      | GAATAGCTAGACGCGTGTTAAATCC<br>AATATC     |
| F332D    | GCGATTGAAGATCCTGACGAGATTT<br>CACATAATG   | CATTATGTGAAATCTCGTCAGGATCT<br>TCAATCGC  |
| H336A    | CTTTCGAGATTTCAGCTAATGTGGG<br>TAGG        | CCTACCCACATTAAGTCAAATCTCG<br>AAAG       |
| Δ310-322 | GGATGGACTTCAGCTGACAGGTATA<br>TTCTTGCG    | CGCAAGAATATACCTGTCAGCTGAA<br>GTCCATCC   |

## Supplementary Figures and Legends

**Figure S1: View of the Fo – Fc difference density maps of the UMPNPP and ApU compounds bound to Cid1.**

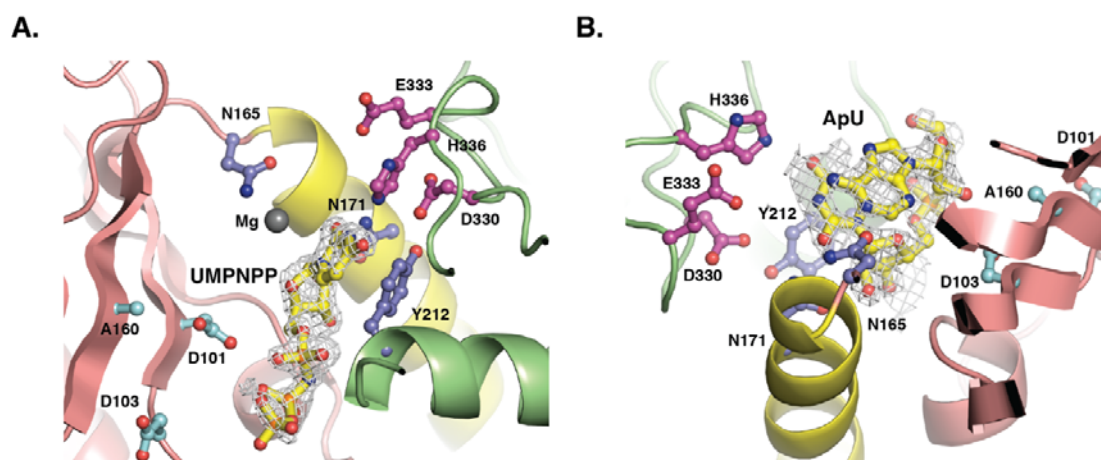

**(A)** Fo – Fc difference density map of the UMPNPP nucleotide bound to Cid1. The Cid1 protein is shown in lime (CD domain) and salmon pink (CAT domain) with helix 4 in yellow. The NRM loop residues are colored in light magenta, the aspartate triad residues are colored in cyan and the major residues interacting with the ligands are shown in slate. Side chains and ligands are shown using a ball and stick representation (carbon as indicated before, nitrogen in blue, oxygen in red). The difference map was calculated using the refined protein as a model and is shown as a gray mesh (contoured at 2.5 $\sigma$ ). **(B)** Fo – Fc difference density map of the minimal product ApU bound to Cid1. The difference map was calculated using the refined protein as a model and is shown as a gray mesh (contoured at 2.5 $\sigma$ ). Side chains and ligand are shown as in panel A.

**Figure S2: Characterization of the RNA binding properties of the WT and mutant Cid1 proteins by electrophoretic mobility shift assay (EMSA).**

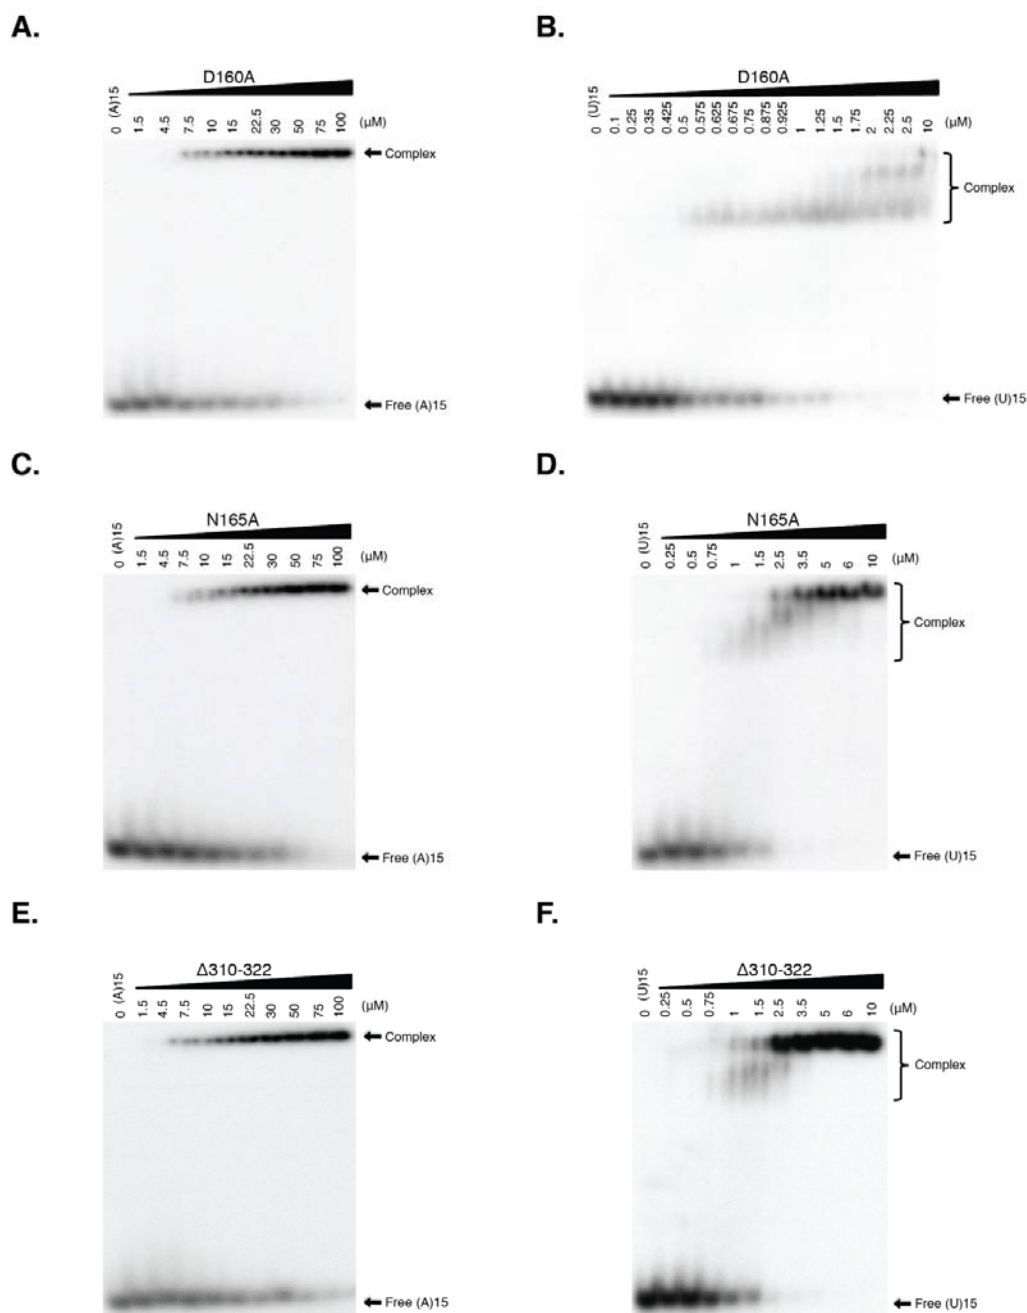

(A) EMSA showing the association between D160A mutant and an A<sub>15</sub> probe. (B) EMSA showing the interaction between D160A mutant and U<sub>15</sub> RNA. (C) EMSA showing the binding between N165A mutant and A<sub>15</sub> RNA. (D) EMSA illustrating the binding between N165A mutant and a U<sub>15</sub> probe. (E) EMSA displaying the interaction of Δ310-322 mutant and A<sub>15</sub> RNA. (F) EMSA showing the association of Δ310-322 mutant and a U<sub>15</sub> probe. Individual reactions in all the panels contained no protein or the indicated amounts.
